# Supplementary material
Source: HighWire-hosted journal article supplement (https://gut.bmj.com/content/72/4/671)
Supplement: inline-supplementary-material-2 [file inline-supplementary-material-2.pdf]

## Supplemental Figure 1

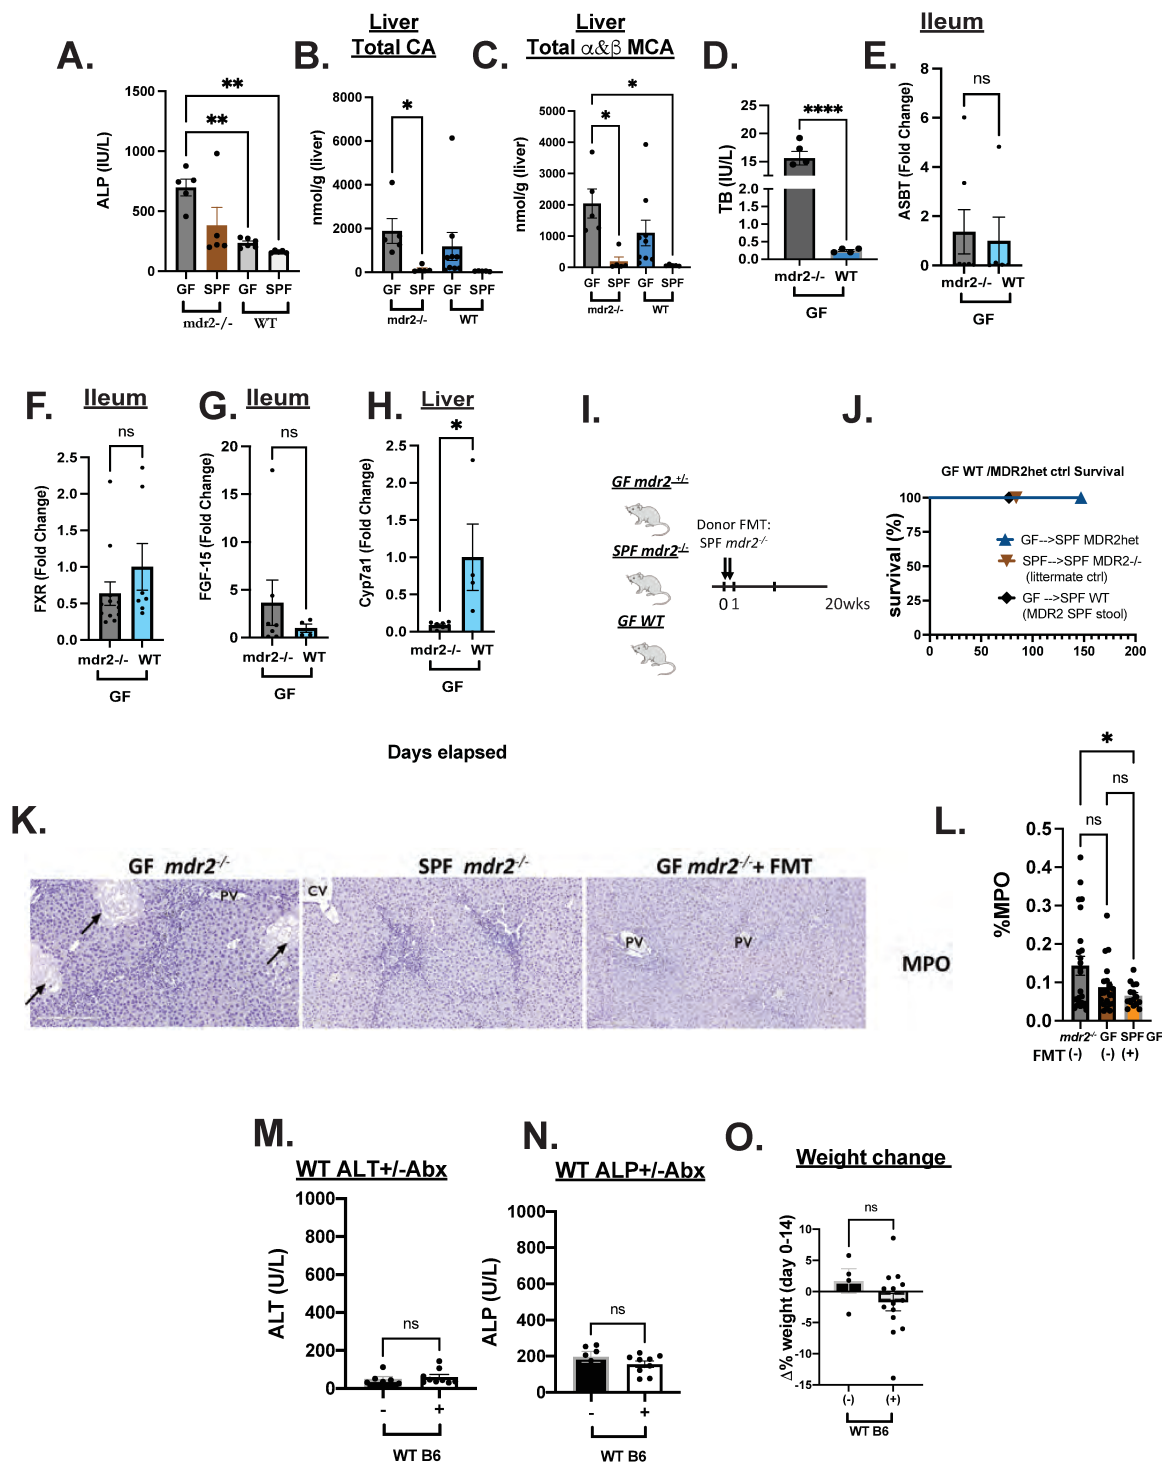

Supplemental Figure 2

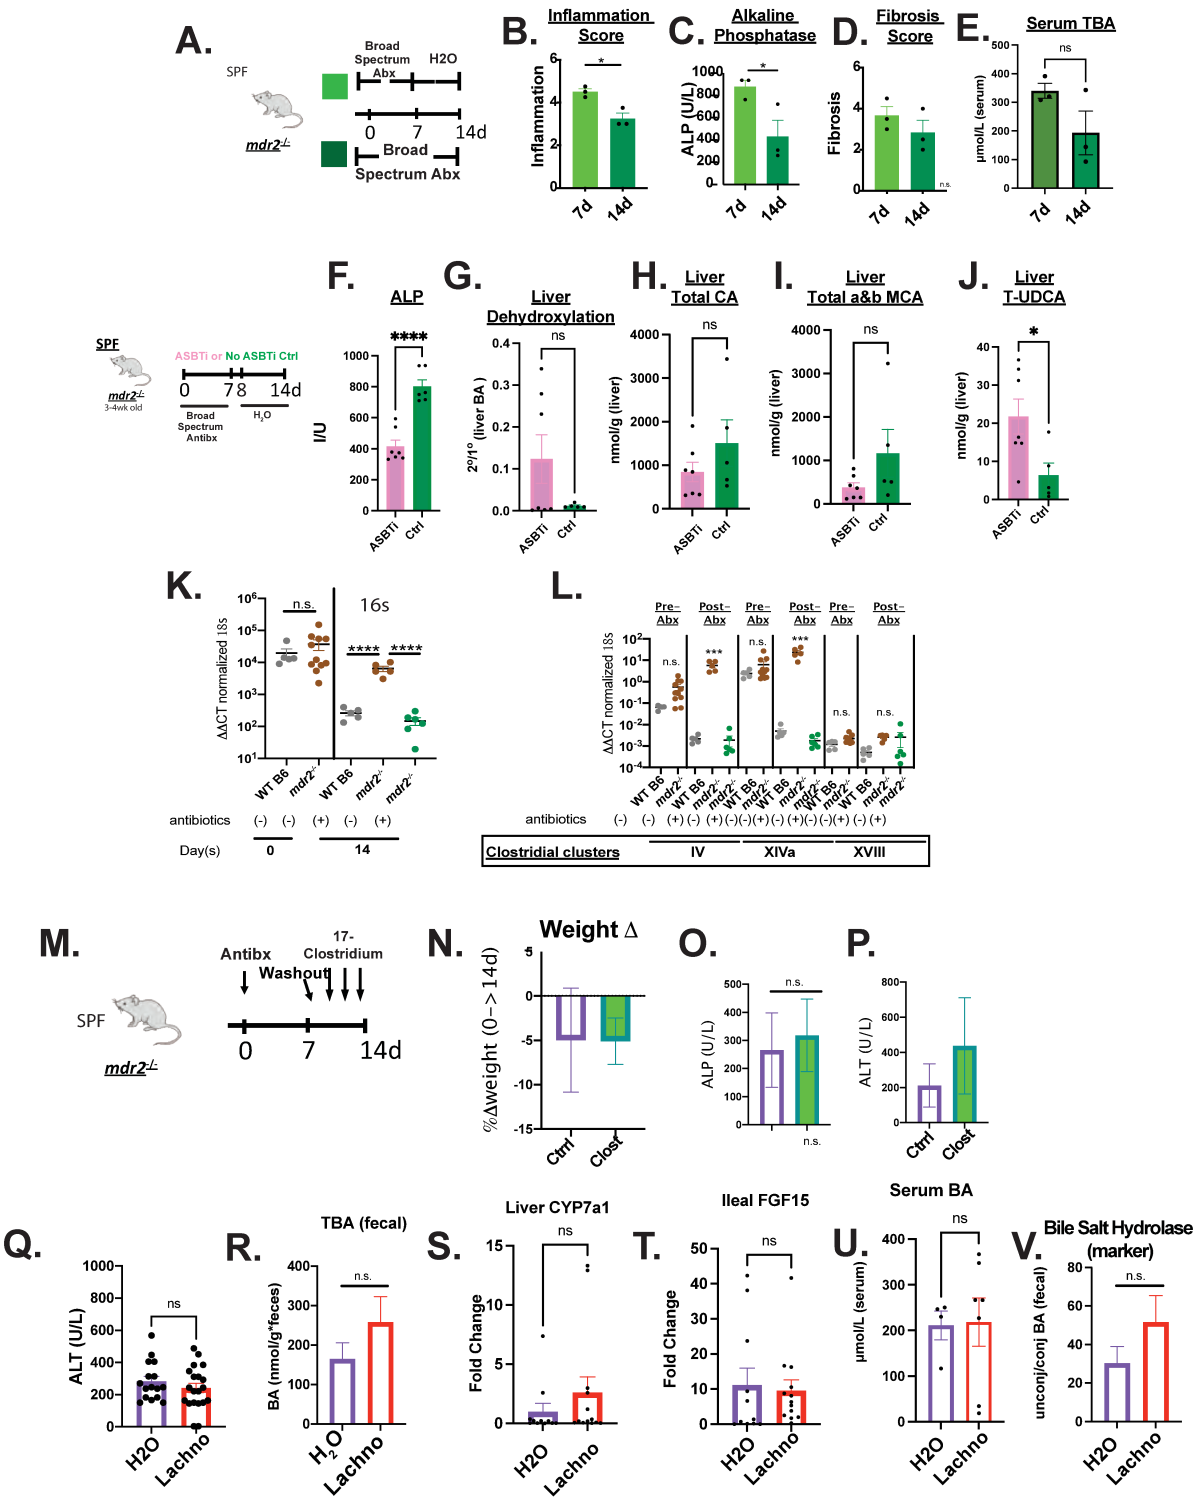

## Supplementary Figure 3

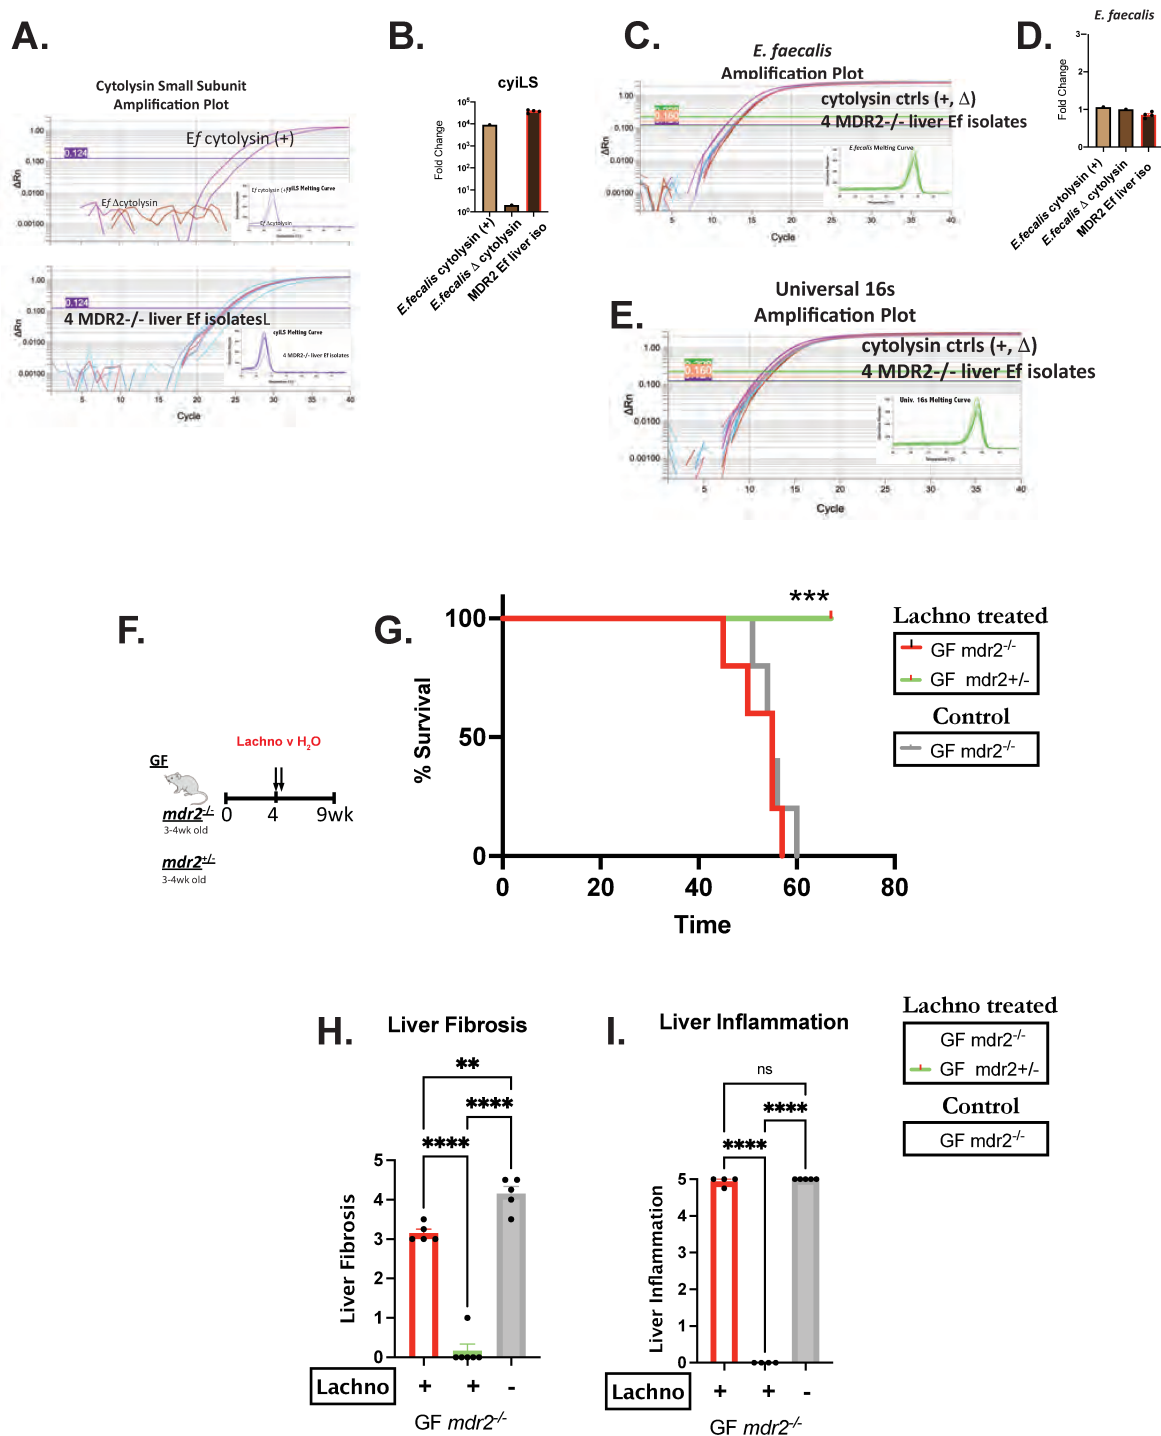

**Table S1: Primers for qPCR**

| <b>Taqman Probes (mouse)</b>      | <b>Cat #</b>          |                       |
|-----------------------------------|-----------------------|-----------------------|
| <b>MCP-1</b>                      | Mm00441242_m1         |                       |
| <b>Lcn-2</b>                      | Mm01324470_m1         |                       |
| <b>Col1a1</b>                     | Mm00801666_g1         |                       |
| <b>TIMP-1</b>                     | Mm01341361_m1         |                       |
| <b>SYBR green primers (mouse)</b> | <b>Forward</b>        | <b>Reverse</b>        |
| <b>iNOS2</b>                      | GTGTTCCACCAGGAGATGTTG | CTCCTGCCCACTGAGTTCGTC |
| <b>IL-6</b>                       | AGTTGCCTTCTTGGGACTGA  | TCCACGATTTCCCAGAGAAC  |
| <b>TNF-a</b>                      | CTGGGACAGTGACCTGGACT  | GCACCTCAGGGAAGAGTCTG  |
| <b>18s</b>                        | ggtaaccggtgaaccccat   | caacgcaagcttatgaccg   |

18s was used as reference gene. MCP-1, Monocyte Chemoattractant Protein-1; Lcn-2, Lipocalin-2; Col1a1, collagen 1a1; Timp1, tissue inhibitor of metalloproteinases 1; iNos-2, inducible nitric oxide-2; IL-6, Interleukin-6; TNF-a, Tumor Necrosis Factor-alpha.
